# Supplementary material
Source: publisher figshare collection journal article supplement (https://tandf.figshare.com/articles/dataset/_/14611044)

**Supplementary File 1:** The vertically integrated moisture flux (vector in kg m-1 s-1) for wet (a) and dry (b) periods; Precipitation distribution over Iran and nearby regions in wet (c) and dry (d) periods; and the stability of atmosphere (Omega ω) variations over Iran and nearby regions during wet (e) and dry (f) periods.


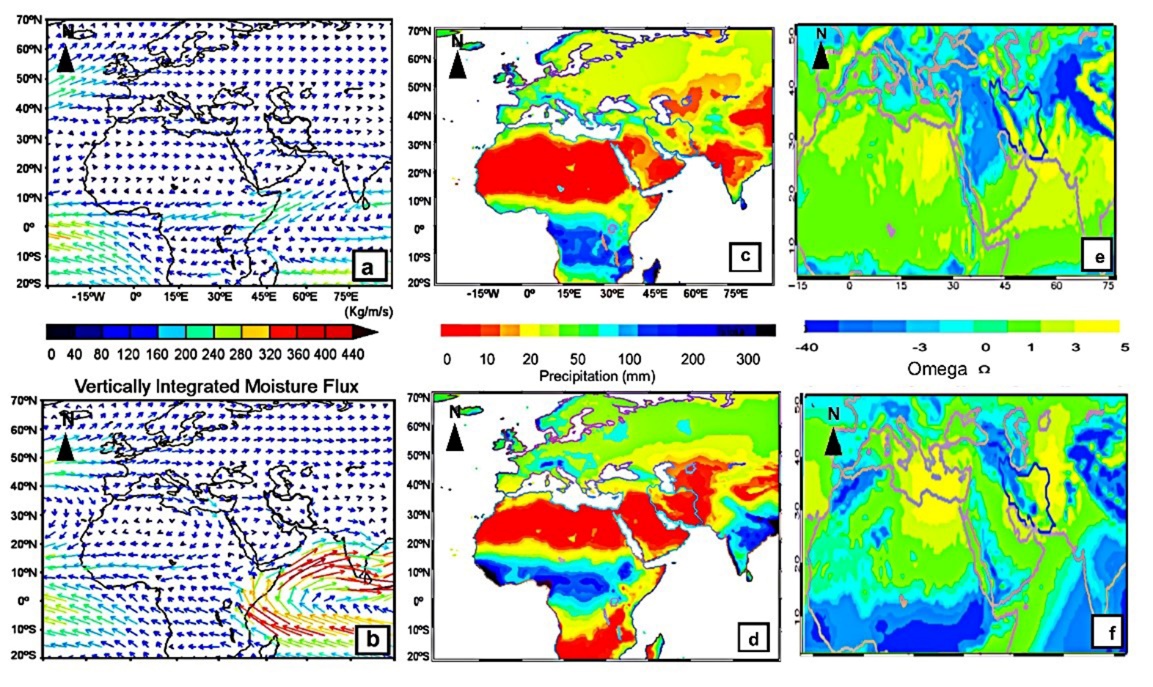

Supplement: Supplementary file 1 [file 1]
